# Supplementary material
Source: publisher figshare collection journal article supplement (https://plos.figshare.com/articles/dataset/_/152281)
Supplement: Supplementary file 1 [file 1]

Archive with 5 entries (5 files):
- Dataset_S1.txt
- Figure_S1.pdf
- Figure_S2.pdf
- Protocol_S1.pdf
- Table_S1.pdf
