# Supplementary material
Source: publisher figshare collection journal article supplement (https://plos.figshare.com/articles/dataset/_/152281)
Supplement: Supplementary file 1 [file 1 › Dataset_S1.txt]

	GGAA3A07M	ATA47D07	ATA79C10	GATA129H04	GATA72H07	GATA26G09P	GATA6A05	GATA124C08N	GATA133A08Q	ATA42G12M	GATA43A04	GGAA5F09	TATC028	GTT028	GATA48B01	GATA124F08	GATA4H09	ATA29C07L	AAT243	GATA50F11	TTTA049	SRAP	GATA72G11N	GATA116B01N	GATA11H10	GATA8F07	GATA88G05	GATA176C01	GATA4E11	GATA4D07	GGAA20G04	ATA27H09	GATA71D01	GATA52A04M	GATA4G12	GATA23D03N	GATA12H10	GATA23A02	AGAT021	GATA69E12M	AGAT010	GATA131D09	GATA164B08P	GGAA4B09N	GATA73D01	GATA27C08P	GATA8B05M	ATA10H11	AGAT128
1-pop1-1	157	121	247	240	293	128	198	135	102	182	142	168	-9	178	238	229	188	258	171	176	238	120	320	169	140	249	312	251	140	346	141	147	276	162	294	200	223	158	222	159	272	143	258	227	191	155	-9	121	278
1-pop1-1	145	118	241	240	293	120	194	111	102	179	127	136	-9	172	238	229	173	255	168	156	238	120	308	146	128	249	308	251	140	334	129	147	276	130	278	196	223	147	222	143	272	143	242	220	191	147	-9	112	278
	0.5	0.5	0.5	0.5	0.5	0.5	0.5	0.5	0.5	0.5	0.5	0.5	0.5	0.5	0.5	0.5	0.5	0.5	0.5	0.5	0.5	0.5	0.5	0.5	0.5	0.5	0.5	0.5	0.5	0.5	0.5	0.5	0.5	0.5	0.5	0.5	0.5	0.5	0.5	0.5	0.5	0.5	0.5	0.5	0.5	0.5	0.5	0.5	0.5
2-pop1-2	-9	118	235	235	289	120	190	135	102	191	163	164	255	178	238	237	177	261	180	160	242	124	308	177	132	254	328	247	168	346	161	150	276	158	290	200	243	158	222	163	270	155	242	220	199	155	171	112	258
2-pop1-2	-9	118	232	228	285	116	182	123	102	179	135	160	251	178	238	229	173	246	168	160	238	116	308	158	124	249	312	247	168	330	145	129	276	138	270	192	223	154	214	155	268	143	236	215	199	152	171	112	250
	0.5	0.5	0.5	0.5	0.5	0.5	0.5	0.5	0.5	0.5	0.5	0.5	0.5	0.5	0.5	0.5	0.5	0.5	0.5	0.5	0.5	0.5	0.5	0.5	0.5	0.5	0.5	0.5	0.5	0.5	0.5	0.5	0.5	0.5	0.5	0.5	0.5	0.5	0.5	0.5	0.5	0.5	0.5	0.5	0.5	0.5	0.5	0.5	0.5
3-pop1-3	-9	121	241	235	285	128	190	135	102	-9	147	164	255	178	230	237	177	258	189	164	238	120	308	192	136	257	324	247	172	342	153	150	276	166	282	216	223	162	-9	163	270	151	258	219	191	147	171	109	274
3-pop1-3	-9	115	238	232	285	128	186	135	102	-9	146	148	251	169	222	237	173	252	162	160	238	120	308	184	132	249	316	247	160	338	141	129	276	150	274	212	219	157	-9	147	268	147	232	219	191	147	167	103	270
	0.5	0.5	0.5	0.5	0.5	0.5	0.5	0.5	0.5	0.5	0.5	0.5	0.5	0.5	0.5	0.5	0.5	0.5	0.5	0.5	0.5	0.5	0.5	0.5	0.5	0.5	0.5	0.5	0.5	0.5	0.5	0.5	0.5	0.5	0.5	0.5	0.5	0.5	0.5	0.5	0.5	0.5	0.5	0.5	0.5	0.5	0.5	0.5	0.5
4-pop1-4	149	121	241	251	293	124	186	123	102	176	135	160	255	178	230	237	173	249	186	156	238	136	322	173	128	265	320	250	172	338	129	129	284	170	294	208	219	154	242	167	276	147	243	249	187	156	167	112	274
4-pop1-4	141	121	232	216	281	120	186	111	102	170	135	152	251	178	230	237	173	246	171	144	238	120	308	154	124	261	312	222	156	322	129	129	276	158	290	192	219	150	222	159	272	139	238	206	183	139	167	109	274
	0.5	0.5	0.5	0.5	0.5	0.5	0.5	0.5	0.5	0.5	0.5	0.5	0.5	0.5	0.5	0.5	0.5	0.5	0.5	0.5	0.5	0.5	0.5	0.5	0.5	0.5	0.5	0.5	0.5	0.5	0.5	0.5	0.5	0.5	0.5	0.5	0.5	0.5	0.5	0.5	0.5	0.5	0.5	0.5	0.5	0.5	0.5	0.5	0.5
5-pop1-6	185	118	241	247	293	120	218	139	102	185	131	160	255	178	238	245	181	261	-9	164	238	124	332	187	128	269	316	258	168	346	153	129	284	154	306	216	223	157	222	159	272	-9	250	220	195	155	171	109	286
5-pop1-6	177	118	238	240	285	120	194	119	102	182	128	156	255	169	238	229	165	249	-9	152	238	116	308	165	124	257	312	247	164	342	145	129	276	142	290	200	223	143	198	151	272	-9	250	220	191	147	171	109	282
	0.5	0.5	0.5	0.5	0.5	0.5	0.5	0.5	0.5	0.5	0.5	0.5	0.5	0.5	0.5	0.5	0.5	0.5	0.5	0.5	0.5	0.5	0.5	0.5	0.5	0.5	0.5	0.5	0.5	0.5	0.5	0.5	0.5	0.5	0.5	0.5	0.5	0.5	0.5	0.5	0.5	0.5	0.5	0.5	0.5	0.5	0.5	0.5	0.5
6-pop1-7	153	118	244	255	289	124	186	135	102	182	150	160	251	178	242	237	177	258	171	176	242	120	332	173	136	253	320	250	164	338	157	129	276	162	290	212	223	143	-9	159	270	159	254	220	191	155	171	112	278
6-pop1-7	145	118	244	213	269	120	186	135	102	176	139	144	251	178	238	229	173	246	171	148	238	120	320	158	136	245	308	222	164	326	149	129	276	150	270	208	223	143	-9	147	270	147	225	215	187	155	171	109	274
	0.5	0.5	0.5	0.5	0.5	0.5	0.5	0.5	0.5	0.5	0.5	0.5	0.5	0.5	0.5	0.5	0.5	0.5	0.5	0.5	0.5	0.5	0.5	0.5	0.5	0.5	0.5	0.5	0.5	0.5	0.5	0.5	0.5	0.5	0.5	0.5	0.5	0.5	0.5	0.5	0.5	0.5	0.5	0.5	0.5	0.5	0.5	0.5	0.5
7-pop1-8	163	121	241	251	289	124	190	135	102	185	138	168	255	178	234	233	188	261	186	156	238	124	336	207	136	269	308	257	164	342	161	147	284	166	290	212	239	154	230	159	272	147	258	215	195	155	171	112	274
7-pop1-8	155	118	232	239	289	120	190	131	102	179	135	164	251	172	234	233	173	246	180	144	238	120	320	165	136	249	308	247	156	330	161	129	276	150	282	212	223	154	214	147	268	143	241	215	191	155	167	106	270
	0.5	0.5	0.5	0.5	0.5	0.5	0.5	0.5	0.5	0.5	0.5	0.5	0.5	0.5	0.5	0.5	0.5	0.5	0.5	0.5	0.5	0.5	0.5	0.5	0.5	0.5	0.5	0.5	0.5	0.5	0.5	0.5	0.5	0.5	0.5	0.5	0.5	0.5	0.5	0.5	0.5	0.5	0.5	0.5	0.5	0.5	0.5	0.5	0.5
8-pop1-9	155	121	244	220	289	124	214	139	102	191	131	184	255	175	234	237	177	255	177	152	242	120	308	154	132	249	316	257	168	342	181	147	276	154	290	220	231	150	246	159	272	147	254	227	191	151	171	112	278
8-pop1-9	149	118	238	213	277	124	182	139	102	182	116	172	251	169	234	229	173	246	168	144	238	120	308	154	128	249	312	198	140	334	169	129	276	154	278	192	219	147	222	155	270	147	238	206	183	143	171	106	274
	0.5	0.5	0.5	0.5	0.5	0.5	0.5	0.5	0.5	0.5	0.5	0.5	0.5	0.5	0.5	0.5	0.5	0.5	0.5	0.5	0.5	0.5	0.5	0.5	0.5	0.5	0.5	0.5	0.5	0.5	0.5	0.5	0.5	0.5	0.5	0.5	0.5	0.5	0.5	0.5	0.5	0.5	0.5	0.5	0.5	0.5	0.5	0.5	0.5
9-pop1-10	173	118	238	240	285	128	194	135	102	185	161	152	255	181	234	233	177	249	180	160	-9	124	308	162	124	249	320	247	168	346	157	150	276	158	274	212	235	165	222	171	272	143	213	215	195	155	171	109	274
9-pop1-10	141	118	238	209	281	120	194	123	102	179	131	152	251	178	234	225	149	246	168	148	-9	120	304	158	120	249	312	241	164	338	141	129	276	150	270	188	223	154	218	147	270	143	213	206	191	147	167	109	270
	0.5	0.5	0.5	0.5	0.5	0.5	0.5	0.5	0.5	0.5	0.5	0.5	0.5	0.5	0.5	0.5	0.5	0.5	0.5	0.5	0.5	0.5	0.5	0.5	0.5	0.5	0.5	0.5	0.5	0.5	0.5	0.5	0.5	0.5	0.5	0.5	0.5	0.5	0.5	0.5	0.5	0.5	0.5	0.5	0.5	0.5	0.5	0.5	0.5
10-pop1-12	141	124	247	239	285	120	190	135	102	191	157	164	255	178	238	233	173	246	171	160	238	120	336	158	144	245	324	255	168	338	149	129	276	170	298	192	231	165	-9	163	272	151	242	222	195	159	175	109	270
10-pop1-12	141	115	238	216	285	120	190	119	102	182	134	160	255	178	234	229	173	243	171	152	238	116	304	154	124	245	316	222	166	334	149	129	276	170	282	192	219	154	-9	155	272	147	232	215	188	143	171	109	266
	0.5	0.5	0.5	0.5	0.5	0.5	0.5	0.5	0.5	0.5	0.5	0.5	0.5	0.5	0.5	0.5	0.5	0.5	0.5	0.5	0.5	0.5	0.5	0.5	0.5	0.5	0.5	0.5	0.5	0.5	0.5	0.5	0.5	0.5	0.5	0.5	0.5	0.5	0.5	0.5	0.5	0.5	0.5	0.5	0.5	0.5	0.5	0.5	0.5
11-pop1-13	173	118	244	247	289	128	190	135	102	188	151	156	255	169	234	237	181	261	186	164	238	124	308	169	144	249	308	247	172	346	145	150	284	154	302	208	223	158	230	159	272	151	236	220	191	151	171	109	270
11-pop1-13	161	115	238	217	273	128	190	119	102	185	139	144	255	169	234	213	149	255	168	152	238	124	304	154	128	249	308	241	156	310	129	129	276	146	274	204	223	143	202	147	272	151	229	215	183	135	171	103	270
	0.5	0.5	0.5	0.5	0.5	0.5	0.5	0.5	0.5	0.5	0.5	0.5	0.5	0.5	0.5	0.5	0.5	0.5	0.5	0.5	0.5	0.5	0.5	0.5	0.5	0.5	0.5	0.5	0.5	0.5	0.5	0.5	0.5	0.5	0.5	0.5	0.5	0.5	0.5	0.5	0.5	0.5	0.5	0.5	0.5	0.5	0.5	0.5	0.5
12-pop1-14	157	121	247	232	301	128	210	111	102	185	135	152	255	178	238	245	181	261	-9	-9	238	128	300	177	132	-9	-9	259	176	330	165	147	276	154	286	212	227	154	230	163	274	147	246	231	-9	147	171	-9	270
12-pop1-14	141	118	244	227	289	120	210	111	102	176	134	136	255	178	230	241	173	246	-9	-9	238	120	300	142	128	-9	-9	198	140	322	145	129	276	150	274	192	223	154	198	155	272	131	246	221	-9	147	171	-9	270
	0.5	0.5	0.5	0.5	0.5	0.5	0.5	0.5	0.5	0.5	0.5	0.5	0.5	0.5	0.5	0.5	0.5	0.5	0.5	0.5	0.5	0.5	0.5	0.5	0.5	0.5	0.5	0.5	0.5	0.5	0.5	0.5	0.5	0.5	0.5	0.5	0.5	0.5	0.5	0.5	0.5	0.5	0.5	0.5	0.5	0.5	0.5	0.5	0.5
13-pop1-15	161	118	244	247	293	120	198	139	102	191	139	168	-9	178	238	225	181	255	-9	152	238	124	324	161	144	-9	308	255	164	330	157	129	276	150	298	212	223	154	226	147	272	-9	-9	222	199	151	171	109	274
13-pop1-15	149	115	244	243	265	120	186	139	102	179	135	156	-9	172	230	213	177	246	-9	148	238	120	304	154	128	-9	308	222	140	330	129	129	276	146	278	192	223	154	214	147	268	-9	-9	215	187	147	171	109	270
	0.5	0.5	0.5	0.5	0.5	0.5	0.5	0.5	0.5	0.5	0.5	0.5	0.5	0.5	0.5	0.5	0.5	0.5	0.5	0.5	0.5	0.5	0.5	0.5	0.5	0.5	0.5	0.5	0.5	0.5	0.5	0.5	0.5	0.5	0.5	0.5	0.5	0.5	0.5	0.5	0.5	0.5	0.5	0.5	0.5	0.5	0.5	0.5	0.5
14-pop1-16	161	121	247	247	293	128	194	139	102	182	165	152	255	184	230	237	185	246	186	164	238	132	328	165	144	249	324	255	180	338	169	129	284	162	282	192	223	157	218	147	272	151	236	220	191	155	171	112	278
14-pop1-16	137	118	235	213	293	124	189	131	102	179	127	152	251	169	222	229	177	246	168	144	238	120	312	165	132	245	304	218	168	310	141	129	276	158	278	192	223	154	214	147	272	143	222	215	191	151	171	109	274
	0.5	0.5	0.5	0.5	0.5	0.5	0.5	0.5	0.5	0.5	0.5	0.5	0.5	0.5	0.5	0.5	0.5	0.5	0.5	0.5	0.5	0.5	0.5	0.5	0.5	0.5	0.5	0.5	0.5	0.5	0.5	0.5	0.5	0.5	0.5	0.5	0.5	0.5	0.5	0.5	0.5	0.5	0.5	0.5	0.5	0.5	0.5	0.5	0.5
15-pop1-18	165	121	241	217	285	124	-9	139	102	179	135	164	255	178	238	237	173	246	-9	164	238	128	319	173	132	-9	-9	259	164	338	153	150	288	162	286	204	227	158	230	-9	272	143	-9	227	187	151	171	-9	278
15-pop1-18	137	118	241	213	269	120	-9	139	102	173	135	160	255	178	238	233	173	246	-9	148	238	120	304	165	132	-9	-9	247	160	334	141	129	284	162	274	200	227	154	210	-9	272	135	-9	221	187	151	171	-9	274
	0.5	0.5	0.5	0.5	0.5	0.5	0.5	0.5	0.5	0.5	0.5	0.5	0.5	0.5	0.5	0.5	0.5	0.5	0.5	0.5	0.5	0.5	0.5	0.5	0.5	0.5	0.5	0.5	0.5	0.5	0.5	0.5	0.5	0.5	0.5	0.5	0.5	0.5	0.5	0.5	0.5	0.5	0.5	0.5	0.5	0.5	0.5	0.5	0.5
16-pop1-72	173	124	247	247	293	124	194	135	102	188	134	160	255	178	238	233	177	261	180	176	242	120	332	199	140	245	320	247	168	342	161	129	284	158	278	200	223	157	221	159	270	147	214	220	191	147	171	112	270
16-pop1-72	147	118	232	231	289	120	194	135	102	182	134	152	251	169	234	225	173	243	171	148	242	120	324	173	128	245	300	222	140	334	141	129	276	158	274	192	219	150	218	155	270	142	214	215	191	143	171	109	270
	0.5	0.5	0.5	0.5	0.5	0.5	0.5	0.5	0.5	0.5	0.5	0.5	0.5	0.5	0.5	0.5	0.5	0.5	0.5	0.5	0.5	0.5	0.5	0.5	0.5	0.5	0.5	0.5	0.5	0.5	0.5	0.5	0.5	0.5	0.5	0.5	0.5	0.5	0.5	0.5	0.5	0.5	0.5	0.5	0.5	0.5	0.5	0.5	0.5
17-pop2-20	145	118	238	251	289	128	194	139	102	182	167	164	251	178	242	233	177	255	168	172	238	128	316	166	129	245	312	247	176	334	165	147	276	162	278	196	223	150	234	159	272	143	226	232	191	151	171	112	274
17-pop2-20	145	115	232	235	289	124	186	135	102	182	163	140	251	178	230	229	177	249	168	168	238	128	308	162	124	245	312	222	176	330	157	129	276	154	278	192	223	150	213	159	268	135	222	206	183	139	171	109	274
	0.5	0.5	0.5	0.5	0.5	0.5	0.5	0.5	0.5	0.5	0.5	0.5	0.5	0.5	0.5	0.5	0.5	0.5	0.5	0.5	0.5	0.5	0.5	0.5	0.5	0.5	0.5	0.5	0.5	0.5	0.5	0.5	0.5	0.5	0.5	0.5	0.5	0.5	0.5	0.5	0.5	0.5	0.5	0.5	0.5	0.5	0.5	0.5	0.5
18-pop2-21	173	118	238	221	289	128	182	147	102	188	167	160	255	178	-9	-9	192	246	-9	172	238	128	320	184	124	-9	316	259	164	346	141	129	-9	142	286	204	223	-9	226	163	270	147	243	224	195	151	171	-9	274
18-pop2-21	145	118	238	221	289	116	170	139	102	182	127	140	251	172	-9	-9	177	246	-9	160	238	120	312	184	124	-9	308	251	160	346	141	129	-9	138	286	188	219	-9	226	151	268	147	229	215	195	139	171	-9	266
	0.5	0.5	0.5	0.5	0.5	0.5	0.5	0.5	0.5	0.5	0.5	0.5	0.5	0.5	0.5	0.5	0.5	0.5	0.5	0.5	0.5	0.5	0.5	0.5	0.5	0.5	0.5	0.5	0.5	0.5	0.5	0.5	0.5	0.5	0.5	0.5	0.5	0.5	0.5	0.5	0.5	0.5	0.5	0.5	0.5	0.5	0.5	0.5	0.5
19-pop2-22	149	118	241	239	289	124	-9	-9	102	185	143	164	255	181	238	241	181	249	-9	168	238	120	332	169	136	-9	-9	251	168	342	169	147	276	146	278	220	223	157	221	-9	268	-9	230	224	191	151	171	-9	274
19-pop2-22	141	118	232	239	285	120	-9	-9	102	173	135	140	255	178	234	233	177	246	-9	160	238	120	308	154	128	-9	-9	247	164	326	161	129	276	146	274	188	223	153	217	-9	268	-9	218	224	191	139	171	-9	274
	0.5	0.5	0.5	0.5	0.5	0.5	0.5	0.5	0.5	0.5	0.5	0.5	0.5	0.5	0.5	0.5	0.5	0.5	0.5	0.5	0.5	0.5	0.5	0.5	0.5	0.5	0.5	0.5	0.5	0.5	0.5	0.5	0.5	0.5	0.5	0.5	0.5	0.5	0.5	0.5	0.5	0.5	0.5	0.5	0.5	0.5	0.5	0.5	0.5
20-pop2-23	169	118	247	201	293	124	194	139	102	185	135	176	-9	181	-9	241	192	255	183	168	238	128	336	173	144	249	316	243	164	342	153	129	284	154	298	208	223	157	-9	159	270	151	233	224	-9	151	171	115	278
20-pop2-23	149	115	247	201	289	120	190	119	102	170	135	152	-9	178	-9	233	177	243	168	156	238	120	308	166	120	245	304	239	164	326	141	126	276	146	298	192	223	154	-9	155	268	143	216	224	-9	143	171	115	274
	0.5	0.5	0.5	0.5	0.5	0.5	0.5	0.5	0.5	0.5	0.5	0.5	0.5	0.5	0.5	0.5	0.5	0.5	0.5	0.5	0.5	0.5	0.5	0.5	0.5	0.5	0.5	0.5	0.5	0.5	0.5	0.5	0.5	0.5	0.5	0.5	0.5	0.5	0.5	0.5	0.5	0.5	0.5	0.5	0.5	0.5	0.5	0.5	0.5
21-pop2-24	145	118	241	251	293	124	170	139	102	185	145	160	251	181	-9	241	173	243	183	-9	238	120	344	184	125	253	-9	263	176	334	153	129	276	154	282	216	223	158	234	171	272	151	235	206	199	163	171	-9	270
21-pop2-24	141	118	241	251	293	124	170	135	102	179	142	152	251	181	-9	229	173	243	174	-9	238	120	320	162	125	245	-9	243	164	334	153	129	276	142	282	204	219	146	234	159	268	151	224	206	195	147	171	-9	270
	0.5	0.5	0.5	0.5	0.5	0.5	0.5	0.5	0.5	0.5	0.5	0.5	0.5	0.5	0.5	0.5	0.5	0.5	0.5	0.5	0.5	0.5	0.5	0.5	0.5	0.5	0.5	0.5	0.5	0.5	0.5	0.5	0.5	0.5	0.5	0.5	0.5	0.5	0.5	0.5	0.5	0.5	0.5	0.5	0.5	0.5	0.5	0.5	0.5
22-pop2-25	149	118	235	243	297	124	182	135	102	194	167	172	254	178	-9	237	173	249	189	-9	238	120	328	184	140	245	-9	247	172	330	153	129	276	154	282	220	-9	154	222	167	272	151	-9	228	191	155	175	-9	274
22-pop2-25	145	115	235	209	285	124	182	119	102	182	139	140	251	178	-9	233	173	246	174	-9	238	120	304	158	124	245	-9	247	168	330	133	129	276	142	274	196	-9	149	222	167	270	143	-9	224	183	143	171	-9	270
	0.5	0.5	0.5	0.5	0.5	0.5	0.5	0.5	0.5	0.5	0.5	0.5	0.5	0.5	0.5	0.5	0.5	0.5	0.5	0.5	0.5	0.5	0.5	0.5	0.5	0.5	0.5	0.5	0.5	0.5	0.5	0.5	0.5	0.5	0.5	0.5	0.5	0.5	0.5	0.5	0.5	0.5	0.5	0.5	0.5	0.5	0.5	0.5	0.5
23-pop2-71	173	118	247	232	289	128	194	139	102	191	135	168	255	178	238	237	181	261	189	172	238	128	320	180	128	249	324	251	176	326	161	129	300	158	282	200	223	158	242	159	272	155	229	227	191	159	-9	121	278
23-pop2-71	145	118	235	231	289	120	190	135	102	173	127	160	251	178	234	233	177	246	186	172	238	116	312	154	120	245	316	225	168	322	153	129	276	142	278	196	219	150	218	151	268	147	216	211	191	147	-9	115	266
	0.5	0.5	0.5	0.5	0.5	0.5	0.5	0.5	0.5	0.5	0.5	0.5	0.5	0.5	0.5	0.5	0.5	0.5	0.5	0.5	0.5	0.5	0.5	0.5	0.5	0.5	0.5	0.5	0.5	0.5	0.5	0.5	0.5	0.5	0.5	0.5	0.5	0.5	0.5	0.5	0.5	0.5	0.5	0.5	0.5	0.5	0.5	0.5	0.5
24-pop3-27	173	121	247	232	289	120	190	135	102	188	147	164	-9	178	-9	241	177	261	189	164	238	128	312	161	132	257	-9	222	176	338	165	129	276	162	286	204	219	154	226	159	272	151	233	219	191	143	171	115	278
24-pop3-27	169	121	242	224	285	120	174	123	102	179	139	164	-9	178	-9	233	173	255	174	136	238	116	300	146	132	249	-9	222	164	334	165	129	276	162	286	204	219	150	218	151	272	147	229	219	191	143	171	115	274
	0.5	0.5	0.5	0.5	0.5	0.5	0.5	0.5	0.5	0.5	0.5	0.5	0.5	0.5	0.5	0.5	0.5	0.5	0.5	0.5	0.5	0.5	0.5	0.5	0.5	0.5	0.5	0.5	0.5	0.5	0.5	0.5	0.5	0.5	0.5	0.5	0.5	0.5	0.5	0.5	0.5	0.5	0.5	0.5	0.5	0.5	0.5	0.5	0.5
25-pop3-28	169	121	244	224	289	128	190	135	102	191	143	176	255	178	234	229	-9	261	192	136	238	124	312	184	128	253	-9	225	172	322	161	129	276	162	294	208	223	158	226	167	272	151	233	219	191	147	171	121	274
25-pop3-28	143	118	244	224	285	120	182	135	102	182	139	172	255	178	234	229	-9	252	192	136	238	124	312	184	128	249	-9	218	168	318	153	129	276	142	282	208	219	146	218	163	272	147	224	219	187	139	171	115	270
	0.5	0.5	0.5	0.5	0.5	0.5	0.5	0.5	0.5	0.5	0.5	0.5	0.5	0.5	0.5	0.5	0.5	0.5	0.5	0.5	0.5	0.5	0.5	0.5	0.5	0.5	0.5	0.5	0.5	0.5	0.5	0.5	0.5	0.5	0.5	0.5	0.5	0.5	0.5	0.5	0.5	0.5	0.5	0.5	0.5	0.5	0.5	0.5	0.5
26-pop3-29	135	121	245	-9	289	120	194	-9	102	191	135	168	255	181	234	-9	-9	258	192	136	238	128	312	188	132	-9	-9	225	168	346	161	129	-9	159	286	212	219	-9	226	159	272	147	229	219	191	147	171	-9	274
26-pop3-29	123	121	242	-9	285	120	174	-9	102	179	131	160	255	178	234	-9	-9	258	192	136	238	116	312	146	124	-9	-9	202	164	338	141	129	-9	142	286	208	219	-9	226	155	272	143	224	219	191	147	171	-9	266
	0.5	0.5	0.5	0.5	0.5	0.5	0.5	0.5	0.5	0.5	0.5	0.5	0.5	0.5	0.5	0.5	0.5	0.5	0.5	0.5	0.5	0.5	0.5	0.5	0.5	0.5	0.5	0.5	0.5	0.5	0.5	0.5	0.5	0.5	0.5	0.5	0.5	0.5	0.5	0.5	0.5	0.5	0.5	0.5	0.5	0.5	0.5	0.5	0.5
27-pop3-30	139	121	247	236	289	128	178	-9	102	188	139	172	255	181	238	233	-9	258	192	136	238	128	312	161	132	249	320	218	160	342	153	129	276	162	286	208	-9	158	218	179	272	147	237	219	191	147	171	115	274
27-pop3-30	123	118	247	216	285	120	174	-9	102	188	139	168	255	178	234	233	-9	249	180	136	238	124	312	161	120	249	316	218	160	338	153	129	276	162	282	204	-9	154	214	147	272	143	224	219	187	139	167	115	262
	0.5	0.5	0.5	0.5	0.5	0.5	0.5	0.5	0.5	0.5	0.5	0.5	0.5	0.5	0.5	0.5	0.5	0.5	0.5	0.5	0.5	0.5	0.5	0.5	0.5	0.5	0.5	0.5	0.5	0.5	0.5	0.5	0.5	0.5	0.5	0.5	0.5	0.5	0.5	0.5	0.5	0.5	0.5	0.5	0.5	0.5	0.5	0.5	0.5
28-pop3-31	177	121	244	232	289	120	174	139	102	191	143	168	-9	178	-9	237	-9	261	192	168	238	128	304	184	136	253	324	222	176	342	153	129	276	150	286	204	219	154	230	167	272	155	237	219	187	-9	171	118	270
28-pop3-31	177	121	241	228	285	120	174	135	102	188	139	164	-9	178	-9	237	-9	255	189	164	238	124	300	161	132	249	300	202	164	326	153	129	276	142	286	200	219	150	218	159	272	155	237	219	187	-9	171	118	270
	0.5	0.5	0.5	0.5	0.5	0.5	0.5	0.5	0.5	0.5	0.5	0.5	0.5	0.5	0.5	0.5	0.5	0.5	0.5	0.5	0.5	0.5	0.5	0.5	0.5	0.5	0.5	0.5	0.5	0.5	0.5	0.5	0.5	0.5	0.5	0.5	0.5	0.5	0.5	0.5	0.5	0.5	0.5	0.5	0.5	0.5	0.5	0.5	0.5
29-pop3-32	173	121	247	236	285	116	186	123	102	191	135	168	258	178	230	233	184	255	189	180	238	128	320	188	140	249	328	222	168	346	161	129	276	158	286	196	219	154	226	159	272	151	224	220	191	151	171	118	270
29-pop3-32	135	121	242	209	285	116	186	123	102	188	135	164	255	178	222	213	177	251	186	136	238	124	316	146	128	249	324	218	168	342	153	129	276	158	286	192	219	154	222	151	272	131	224	220	191	139	171	118	270
	0.5	0.5	0.5	0.5	0.5	0.5	0.5	0.5	0.5	0.5	0.5	0.5	0.5	0.5	0.5	0.5	0.5	0.5	0.5	0.5	0.5	0.5	0.5	0.5	0.5	0.5	0.5	0.5	0.5	0.5	0.5	0.5	0.5	0.5	0.5	0.5	0.5	0.5	0.5	0.5	0.5	0.5	0.5	0.5	0.5	0.5	0.5	0.5	0.5
30-pop3-33	177	121	244	224	289	-9	186	131	102	182	135	168	-9	178	238	241	-9	261	-9	176	238	124	316	184	132	249	320	218	168	334	165	129	276	166	286	208	219	150	230	163	272	147	237	219	191	151	171	-9	274
30-pop3-33	123	121	242	216	285	-9	174	123	102	179	127	164	-9	178	238	241	-9	249	-9	136	238	124	308	161	128	249	320	218	168	326	153	129	276	142	286	196	219	146	226	155	272	143	233	219	187	143	171	-9	266
	0.5	0.5	0.5	0.5	0.5	0.5	0.5	0.5	0.5	0.5	0.5	0.5	0.5	0.5	0.5	0.5	0.5	0.5	0.5	0.5	0.5	0.5	0.5	0.5	0.5	0.5	0.5	0.5	0.5	0.5	0.5	0.5	0.5	0.5	0.5	0.5	0.5	0.5	0.5	0.5	0.5	0.5	0.5	0.5	0.5	0.5	0.5	0.5	0.5
31-pop3-34	135	121	244	232	289	124	182	139	102	188	151	168	255	178	238	237	177	258	-9	-9	238	128	320	184	144	253	-9	225	164	338	157	129	276	162	294	200	219	158	226	155	272	151	233	219	191	147	-9	121	278
31-pop3-34	129	121	238	228	289	120	174	139	102	179	139	156	255	178	234	233	177	258	-9	-9	238	124	308	161	128	253	-9	218	164	326	157	129	276	158	282	196	219	150	222	151	272	143	225	211	191	147	-9	112	270
	0.5	0.5	0.5	0.5	0.5	0.5	0.5	0.5	0.5	0.5	0.5	0.5	0.5	0.5	0.5	0.5	0.5	0.5	0.5	0.5	0.5	0.5	0.5	0.5	0.5	0.5	0.5	0.5	0.5	0.5	0.5	0.5	0.5	0.5	0.5	0.5	0.5	0.5	0.5	0.5	0.5	0.5	0.5	0.5	0.5	0.5	0.5	0.5	0.5
32-pop3-35	177	121	247	236	285	128	194	139	102	191	139	172	255	178	238	237	177	261	192	136	238	116	320	184	132	249	324	255	168	334	157	129	276	158	282	204	227	158	226	159	272	147	237	219	187	151	171	118	270
32-pop3-35	173	118	247	220	285	120	186	135	102	182	119	164	255	178	230	221	177	258	189	136	238	116	308	161	132	249	320	234	168	330	157	129	276	158	282	200	219	150	222	151	272	147	229	219	183	143	171	118	266
	0.5	0.5	0.5	0.5	0.5	0.5	0.5	0.5	0.5	0.5	0.5	0.5	0.5	0.5	0.5	0.5	0.5	0.5	0.5	0.5	0.5	0.5	0.5	0.5	0.5	0.5	0.5	0.5	0.5	0.5	0.5	0.5	0.5	0.5	0.5	0.5	0.5	0.5	0.5	0.5	0.5	0.5	0.5	0.5	0.5	0.5	0.5	0.5	0.5
33-pop3-36	152	121	247	228	289	-9	194	139	102	191	131	168	255	181	-9	233	188	255	192	-9	238	124	320	184	140	249	-9	222	168	346	165	129	276	162	286	208	231	150	226	159	272	147	245	219	187	155	171	121	274
33-pop3-36	135	121	245	224	285	-9	174	123	102	182	127	164	255	178	-9	213	177	243	189	-9	238	120	308	146	132	249	-9	218	164	338	165	129	276	162	282	204	219	150	218	147	272	139	233	219	183	143	171	121	266
	0.5	0.5	0.5	0.5	0.5	0.5	0.5	0.5	0.5	0.5	0.5	0.5	0.5	0.5	0.5	0.5	0.5	0.5	0.5	0.5	0.5	0.5	0.5	0.5	0.5	0.5	0.5	0.5	0.5	0.5	0.5	0.5	0.5	0.5	0.5	0.5	0.5	0.5	0.5	0.5	0.5	0.5	0.5	0.5	0.5	0.5	0.5	0.5	0.5
34-pop3-37	169	124	247	232	289	128	194	139	102	194	135	160	255	178	238	229	-9	258	189	136	238	128	320	188	132	249	-9	222	172	338	161	129	276	162	286	212	219	154	218	159	272	155	233	219	195	143	171	121	274
34-pop3-37	169	121	247	228	285	120	174	135	102	185	135	160	255	178	222	213	-9	252	189	136	238	124	312	184	124	249	-9	218	168	326	153	129	276	162	278	200	219	154	214	159	272	155	225	219	195	143	171	112	274
	0.5	0.5	0.5	0.5	0.5	0.5	0.5	0.5	0.5	0.5	0.5	0.5	0.5	0.5	0.5	0.5	0.5	0.5	0.5	0.5	0.5	0.5	0.5	0.5	0.5	0.5	0.5	0.5	0.5	0.5	0.5	0.5	0.5	0.5	0.5	0.5	0.5	0.5	0.5	0.5	0.5	0.5	0.5	0.5	0.5	0.5	0.5	0.5	0.5
35-pop3-38	181	121	244	228	285	-9	186	123	102	-9	143	168	255	178	238	241	-9	258	195	172	238	132	320	184	128	249	328	222	168	326	169	129	276	159	286	204	219	158	226	163	272	147	229	219	191	147	171	-9	278
35-pop3-38	135	121	242	224	285	-9	174	123	102	-9	139	156	255	178	234	221	-9	255	174	136	238	116	300	161	128	249	320	214	164	326	169	129	276	150	274	200	219	150	218	151	272	143	225	219	191	147	171	-9	270
	0.5	0.5	0.5	0.5	0.5	0.5	0.5	0.5	0.5	0.5	0.5	0.5	0.5	0.5	0.5	0.5	0.5	0.5	0.5	0.5	0.5	0.5	0.5	0.5	0.5	0.5	0.5	0.5	0.5	0.5	0.5	0.5	0.5	0.5	0.5	0.5	0.5	0.5	0.5	0.5	0.5	0.5	0.5	0.5	0.5	0.5	0.5	0.5	0.5
36-pop3-42	173	121	241	215	289	120	194	135	102	191	135	164	255	178	234	233	188	261	192	176	238	124	319	188	144	249	328	266	164	346	169	129	276	162	286	208	219	150	222	163	272	147	229	219	191	143	171	118	274
36-pop3-42	152	121	235	212	285	116	194	131	102	185	131	164	255	178	230	233	188	249	183	136	238	120	316	184	132	249	312	222	164	334	149	129	276	158	274	200	219	150	214	159	272	147	214	219	187	139	171	118	270
	0.5	0.5	0.5	0.5	0.5	0.5	0.5	0.5	0.5	0.5	0.5	0.5	0.5	0.5	0.5	0.5	0.5	0.5	0.5	0.5	0.5	0.5	0.5	0.5	0.5	0.5	0.5	0.5	0.5	0.5	0.5	0.5	0.5	0.5	0.5	0.5	0.5	0.5	0.5	0.5	0.5	0.5	0.5	0.5	0.5	0.5	0.5	0.5	0.5
37-pop3-43	169	121	244	228	289	124	186	139	102	188	143	168	255	181	234	221	181	258	189	168	238	128	316	184	144	253	328	225	172	346	149	129	276	162	282	208	219	158	226	159	272	151	233	219	191	155	171	121	266
37-pop3-43	143	118	241	208	285	120	186	123	102	185	139	160	255	178	234	221	177	258	189	164	238	116	312	180	128	249	324	217	168	338	149	129	276	155	282	192	219	154	226	159	272	147	229	215	183	147	171	115	266
	0.5	0.5	0.5	0.5	0.5	0.5	0.5	0.5	0.5	0.5	0.5	0.5	0.5	0.5	0.5	0.5	0.5	0.5	0.5	0.5	0.5	0.5	0.5	0.5	0.5	0.5	0.5	0.5	0.5	0.5	0.5	0.5	0.5	0.5	0.5	0.5	0.5	0.5	0.5	0.5	0.5	0.5	0.5	0.5	0.5	0.5	0.5	0.5	0.5
38-pop3-44	177	121	244	211	289	124	194	135	102	188	139	168	255	181	234	237	177	261	192	161	238	124	312	184	140	249	328	225	168	338	165	129	276	163	290	208	227	158	230	159	272	147	229	220	191	147	171	118	270
38-pop3-44	169	121	242	204	289	120	178	123	102	179	135	164	255	181	230	233	173	252	192	136	238	120	304	184	128	249	328	218	160	326	157	129	276	150	282	204	219	146	218	159	272	147	221	215	187	143	167	115	270
	0.5	0.5	0.5	0.5	0.5	0.5	0.5	0.5	0.5	0.5	0.5	0.5	0.5	0.5	0.5	0.5	0.5	0.5	0.5	0.5	0.5	0.5	0.5	0.5	0.5	0.5	0.5	0.5	0.5	0.5	0.5	0.5	0.5	0.5	0.5	0.5	0.5	0.5	0.5	0.5	0.5	0.5	0.5	0.5	0.5	0.5	0.5	0.5	0.5
39-pop3-45	135	121	247	215	293	124	174	135	102	188	139	168	255	178	234	237	177	258	192	180	238	124	312	184	132	253	312	225	168	334	165	129	276	158	282	212	219	154	222	167	272	143	237	219	199	155	171	118	270
39-pop3-45	123	121	244	208	289	120	174	135	102	185	135	168	255	178	230	213	177	255	174	140	238	124	300	184	128	253	308	222	164	326	157	129	276	158	282	212	219	154	218	147	272	139	233	219	191	151	167	115	266
	0.5	0.5	0.5	0.5	0.5	0.5	0.5	0.5	0.5	0.5	0.5	0.5	0.5	0.5	0.5	0.5	0.5	0.5	0.5	0.5	0.5	0.5	0.5	0.5	0.5	0.5	0.5	0.5	0.5	0.5	0.5	0.5	0.5	0.5	0.5	0.5	0.5	0.5	0.5	0.5	0.5	0.5	0.5	0.5	0.5	0.5	0.5	0.5	0.5
40-pop3-46	-9	121	241	228	285	-9	-9	139	102	185	127	164	255	181	234	237	177	261	192	180	238	124	312	188	132	249	316	222	176	338	153	129	276	155	290	196	219	158	226	167	272	147	237	219	191	143	171	118	278
40-pop3-46	-9	118	238	215	285	-9	-9	127	102	179	127	160	255	181	226	221	177	258	192	167	238	124	312	146	132	249	300	218	172	326	153	129	276	150	282	196	219	150	218	163	268	143	225	219	167	139	171	115	274
	0.5	0.5	0.5	0.5	0.5	0.5	0.5	0.5	0.5	0.5	0.5	0.5	0.5	0.5	0.5	0.5	0.5	0.5	0.5	0.5	0.5	0.5	0.5	0.5	0.5	0.5	0.5	0.5	0.5	0.5	0.5	0.5	0.5	0.5	0.5	0.5	0.5	0.5	0.5	0.5	0.5	0.5	0.5	0.5	0.5	0.5	0.5	0.5	0.5
41-pop3-47	135	121	247	228	293	120	186	-9	102	185	135	160	255	178	234	237	177	255	-9	168	238	124	316	161	132	249	320	218	168	350	157	129	276	158	290	212	219	150	226	163	272	-9	233	219	187	155	171	118	270
41-pop3-47	135	118	242	224	285	120	186	-9	102	179	127	160	255	178	234	233	173	249	-9	164	238	116	312	146	128	249	300	218	164	338	153	129	276	154	290	204	219	150	214	147	272	-9	221	219	167	147	171	115	266
	0.5	0.5	0.5	0.5	0.5	0.5	0.5	0.5	0.5	0.5	0.5	0.5	0.5	0.5	0.5	0.5	0.5	0.5	0.5	0.5	0.5	0.5	0.5	0.5	0.5	0.5	0.5	0.5	0.5	0.5	0.5	0.5	0.5	0.5	0.5	0.5	0.5	0.5	0.5	0.5	0.5	0.5	0.5	0.5	0.5	0.5	0.5	0.5	0.5
42-pop3-48	135	124	242	224	289	120	194	123	102	188	139	160	255	178	234	221	188	249	195	164	238	124	316	180	132	253	324	222	168	326	161	129	276	158	286	212	219	154	230	159	272	-9	229	219	191	143	171	121	274
42-pop3-48	123	121	238	220	285	116	182	123	102	179	135	156	255	178	230	213	177	249	189	164	238	116	312	146	128	253	316	218	168	322	141	129	276	142	282	208	219	150	226	159	272	-9	229	215	187	143	167	115	266
	0.5	0.5	0.5	0.5	0.5	0.5	0.5	0.5	0.5	0.5	0.5	0.5	0.5	0.5	0.5	0.5	0.5	0.5	0.5	0.5	0.5	0.5	0.5	0.5	0.5	0.5	0.5	0.5	0.5	0.5	0.5	0.5	0.5	0.5	0.5	0.5	0.5	0.5	0.5	0.5	0.5	0.5	0.5	0.5	0.5	0.5	0.5	0.5	0.5
43-pop3-49	-9	121	247	220	289	124	182	139	102	185	139	164	255	178	234	233	188	261	195	168	238	124	312	184	132	253	320	222	172	334	165	129	276	159	290	208	219	154	226	167	272	147	225	219	187	151	171	118	274
43-pop3-49	-9	121	244	204	285	116	174	123	102	185	131	164	255	178	234	233	181	261	192	136	238	120	304	150	124	249	308	202	164	334	153	129	276	150	290	208	219	154	226	151	272	143	225	219	183	147	167	112	274
	0.5	0.5	0.5	0.5	0.5	0.5	0.5	0.5	0.5	0.5	0.5	0.5	0.5	0.5	0.5	0.5	0.5	0.5	0.5	0.5	0.5	0.5	0.5	0.5	0.5	0.5	0.5	0.5	0.5	0.5	0.5	0.5	0.5	0.5	0.5	0.5	0.5	0.5	0.5	0.5	0.5	0.5	0.5	0.5	0.5	0.5	0.5	0.5	0.5
44-pop3-50	123	121	247	224	293	120	190	135	102	191	139	164	255	178	238	237	181	255	-9	168	238	124	316	184	125	253	324	225	176	334	169	129	280	170	290	212	219	158	226	159	272	-9	229	219	199	155	171	115	278
44-pop3-50	123	121	242	220	289	116	186	123	102	179	135	164	255	178	238	233	177	249	-9	136	238	116	312	161	124	249	312	222	168	330	161	129	276	155	286	204	219	154	226	159	272	-9	229	219	195	139	167	115	270
	0.5	0.5	0.5	0.5	0.5	0.5	0.5	0.5	0.5	0.5	0.5	0.5	0.5	0.5	0.5	0.5	0.5	0.5	0.5	0.5	0.5	0.5	0.5	0.5	0.5	0.5	0.5	0.5	0.5	0.5	0.5	0.5	0.5	0.5	0.5	0.5	0.5	0.5	0.5	0.5	0.5	0.5	0.5	0.5	0.5	0.5	0.5	0.5	0.5
45-pop3-51	135	121	247	215	285	120	186	131	102	179	147	164	255	181	238	233	188	258	-9	180	238	124	319	180	140	249	320	225	168	346	165	129	276	158	286	208	219	154	230	-9	272	151	229	219	187	147	171	121	278
45-pop3-51	123	121	247	208	285	116	174	123	102	179	139	160	255	178	234	217	177	249	-9	172	230	124	312	146	124	249	308	222	168	326	157	129	276	154	282	196	219	150	230	-9	272	151	225	219	187	139	167	112	274
	0.5	0.5	0.5	0.5	0.5	0.5	0.5	0.5	0.5	0.5	0.5	0.5	0.5	0.5	0.5	0.5	0.5	0.5	0.5	0.5	0.5	0.5	0.5	0.5	0.5	0.5	0.5	0.5	0.5	0.5	0.5	0.5	0.5	0.5	0.5	0.5	0.5	0.5	0.5	0.5	0.5	0.5	0.5	0.5	0.5	0.5	0.5	0.5	0.5
46-pop3-52	127	121	248	220	293	120	182	139	102	188	139	168	255	178	230	241	177	252	195	180	238	124	308	188	125	253	320	222	168	326	157	129	276	159	286	212	219	154	230	159	272	155	225	219	187	147	171	118	274
46-pop3-52	123	121	241	204	289	116	174	131	102	188	131	160	255	178	230	213	177	249	192	172	238	124	308	161	124	249	320	218	168	322	157	129	276	158	282	192	219	150	226	159	272	147	221	219	183	147	171	115	270
	0.5	0.5	0.5	0.5	0.5	0.5	0.5	0.5	0.5	0.5	0.5	0.5	0.5	0.5	0.5	0.5	0.5	0.5	0.5	0.5	0.5	0.5	0.5	0.5	0.5	0.5	0.5	0.5	0.5	0.5	0.5	0.5	0.5	0.5	0.5	0.5	0.5	0.5	0.5	0.5	0.5	0.5	0.5	0.5	0.5	0.5	0.5	0.5	0.5
47-pop3-53	135	124	247	232	289	120	194	123	102	185	139	172	255	181	234	241	177	255	189	168	238	128	319	184	128	249	320	258	168	338	169	150	276	163	286	212	231	158	226	159	272	151	233	219	187	151	171	118	270
47-pop3-53	127	121	247	220	285	120	174	123	102	179	131	172	255	178	226	237	177	255	189	136	238	128	300	161	124	249	300	222	164	322	149	129	276	158	274	200	231	154	218	155	272	143	214	219	167	147	171	115	266
	0.5	0.5	0.5	0.5	0.5	0.5	0.5	0.5	0.5	0.5	0.5	0.5	0.5	0.5	0.5	0.5	0.5	0.5	0.5	0.5	0.5	0.5	0.5	0.5	0.5	0.5	0.5	0.5	0.5	0.5	0.5	0.5	0.5	0.5	0.5	0.5	0.5	0.5	0.5	0.5	0.5	0.5	0.5	0.5	0.5	0.5	0.5	0.5	0.5
48-pop3-54	135	121	247	232	285	128	174	135	102	191	139	164	255	181	238	237	184	258	189	172	238	128	316	180	136	249	324	222	168	330	165	129	280	158	290	212	219	154	230	159	272	151	233	219	187	151	171	121	278
48-pop3-54	135	121	244	228	285	120	174	135	102	179	135	160	255	178	234	213	177	258	189	136	238	128	312	146	132	249	320	222	168	326	161	129	276	138	286	208	219	150	226	147	272	143	233	211	187	139	171	118	270
	0.5	0.5	0.5	0.5	0.5	0.5	0.5	0.5	0.5	0.5	0.5	0.5	0.5	0.5	0.5	0.5	0.5	0.5	0.5	0.5	0.5	0.5	0.5	0.5	0.5	0.5	0.5	0.5	0.5	0.5	0.5	0.5	0.5	0.5	0.5	0.5	0.5	0.5	0.5	0.5	0.5	0.5	0.5	0.5	0.5	0.5	0.5	0.5	0.5
49-pop3-55	-9	121	241	232	289	124	194	127	102	191	135	168	255	181	230	237	177	261	-9	180	238	124	312	161	128	-9	324	222	176	338	169	129	276	155	290	208	227	154	230	-9	272	-9	233	219	191	147	171	118	274
49-pop3-55	-9	118	241	228	289	120	174	123	102	182	127	164	255	178	230	221	177	255	-9	176	238	124	312	150	128	-9	300	218	164	330	157	129	276	155	286	192	223	150	218	-9	272	-9	225	219	183	139	167	115	270
	0.5	0.5	0.5	0.5	0.5	0.5	0.5	0.5	0.5	0.5	0.5	0.5	0.5	0.5	0.5	0.5	0.5	0.5	0.5	0.5	0.5	0.5	0.5	0.5	0.5	0.5	0.5	0.5	0.5	0.5	0.5	0.5	0.5	0.5	0.5	0.5	0.5	0.5	0.5	0.5	0.5	0.5	0.5	0.5	0.5	0.5	0.5	0.5	0.5
50-pop3-56	173	121	242	240	289	120	194	135	102	179	143	164	255	178	238	221	177	261	198	176	238	132	316	188	132	253	320	229	172	342	157	129	276	162	282	204	223	158	218	151	272	143	229	219	191	147	171	121	274
50-pop3-56	135	121	238	224	289	116	174	127	102	179	135	160	255	178	230	221	177	261	189	136	238	124	312	161	124	249	300	218	164	330	157	129	276	158	282	200	219	154	218	151	272	143	225	219	187	139	171	115	262
	0.5	0.5	0.5	0.5	0.5	0.5	0.5	0.5	0.5	0.5	0.5	0.5	0.5	0.5	0.5	0.5	0.5	0.5	0.5	0.5	0.5	0.5	0.5	0.5	0.5	0.5	0.5	0.5	0.5	0.5	0.5	0.5	0.5	0.5	0.5	0.5	0.5	0.5	0.5	0.5	0.5	0.5	0.5	0.5	0.5	0.5	0.5	0.5	0.5
51-pop3-57	129	121	247	216	285	128	186	135	102	194	135	164	255	178	230	237	184	258	192	136	238	128	320	150	124	-9	320	218	168	338	157	129	276	158	286	196	227	158	226	163	272	-9	237	219	191	155	171	-9	278
51-pop3-57	127	118	244	216	285	124	182	123	102	185	135	164	255	178	222	237	177	249	174	136	238	124	300	146	124	-9	316	214	160	338	157	129	276	155	282	192	219	154	218	151	272	-9	233	219	183	147	171	-9	270
	0.5	0.5	0.5	0.5	0.5	0.5	0.5	0.5	0.5	0.5	0.5	0.5	0.5	0.5	0.5	0.5	0.5	0.5	0.5	0.5	0.5	0.5	0.5	0.5	0.5	0.5	0.5	0.5	0.5	0.5	0.5	0.5	0.5	0.5	0.5	0.5	0.5	0.5	0.5	0.5	0.5	0.5	0.5	0.5	0.5	0.5	0.5	0.5	0.5
52-pop3-58	135	121	247	228	289	124	194	135	102	191	131	172	255	178	234	233	188	255	-9	136	238	128	312	161	132	-9	324	222	172	326	157	129	276	-9	286	200	219	154	226	151	272	-9	229	219	187	151	171	112	274
52-pop3-58	123	121	238	212	285	116	186	123	98	182	127	172	255	178	230	221	188	252	-9	136	238	128	308	146	124	-9	304	218	164	322	153	129	276	-9	282	196	219	150	218	151	272	-9	221	219	187	147	171	112	266
	0.5	0.5	0.5	0.5	0.5	0.5	0.5	0.5	0.5	0.5	0.5	0.5	0.5	0.5	0.5	0.5	0.5	0.5	0.5	0.5	0.5	0.5	0.5	0.5	0.5	0.5	0.5	0.5	0.5	0.5	0.5	0.5	0.5	0.5	0.5	0.5	0.5	0.5	0.5	0.5	0.5	0.5	0.5	0.5	0.5	0.5	0.5	0.5	0.5
53-pop3-59	173	121	244	228	293	124	194	139	102	191	139	172	255	178	238	237	184	258	195	136	238	128	316	192	132	253	328	218	172	338	169	129	276	142	282	208	231	154	222	151	272	151	237	220	191	151	171	115	274
53-pop3-59	143	121	244	228	285	120	186	123	102	188	127	164	255	178	238	237	177	249	183	136	238	120	312	146	126	249	316	218	168	338	157	129	276	142	282	204	223	150	218	147	272	143	229	211	183	143	171	115	270
	0.5	0.5	0.5	0.5	0.5	0.5	0.5	0.5	0.5	0.5	0.5	0.5	0.5	0.5	0.5	0.5	0.5	0.5	0.5	0.5	0.5	0.5	0.5	0.5	0.5	0.5	0.5	0.5	0.5	0.5	0.5	0.5	0.5	0.5	0.5	0.5	0.5	0.5	0.5	0.5	0.5	0.5	0.5	0.5	0.5	0.5	0.5	0.5	0.5
54-pop3-61	147	121	247	232	289	128	190	-9	102	185	139	172	255	187	234	-9	177	258	-9	164	242	136	312	184	140	-9	312	257	164	338	157	129	276	-9	290	216	219	158	222	-9	272	147	-9	219	191	168	171	118	274
54-pop3-61	141	121	245	208	289	120	174	-9	102	173	131	164	255	178	234	-9	165	249	-9	136	238	120	304	146	128	-9	292	226	164	334	145	129	276	-9	282	200	219	150	214	-9	272	147	-9	219	183	147	171	109	266
	0.5	0.5	0.5	0.5	0.5	0.5	0.5	0.5	0.5	0.5	0.5	0.5	0.5	0.5	0.5	0.5	0.5	0.5	0.5	0.5	0.5	0.5	0.5	0.5	0.5	0.5	0.5	0.5	0.5	0.5	0.5	0.5	0.5	0.5	0.5	0.5	0.5	0.5	0.5	0.5	0.5	0.5	0.5	0.5	0.5	0.5	0.5	0.5	0.5
55-pop3-62	123	121	247	228	293	120	182	135	102	191	143	168	255	178	230	233	177	252	192	172	238	128	312	188	124	-9	320	225	172	342	157	129	276	167	282	208	219	158	222	167	272	147	233	220	195	147	-9	112	270
55-pop3-62	123	121	238	224	289	120	174	123	102	179	139	168	255	178	230	213	173	252	192	136	238	116	312	146	120	-9	316	222	164	326	157	129	276	158	274	204	219	150	218	151	272	147	221	220	195	143	-9	112	266
	0.5	0.5	0.5	0.5	0.5	0.5	0.5	0.5	0.5	0.5	0.5	0.5	0.5	0.5	0.5	0.5	0.5	0.5	0.5	0.5	0.5	0.5	0.5	0.5	0.5	0.5	0.5	0.5	0.5	0.5	0.5	0.5	0.5	0.5	0.5	0.5	0.5	0.5	0.5	0.5	0.5	0.5	0.5	0.5	0.5	0.5	0.5	0.5	0.5
56-pop3-63	135	121	242	232	289	124	194	135	102	185	143	172	255	181	234	237	177	258	192	180	238	128	312	184	140	249	324	225	176	326	153	129	280	166	290	212	219	154	226	159	272	151	233	220	183	155	171	118	274
56-pop3-63	123	121	238	224	285	120	174	135	102	185	139	168	255	178	230	213	177	252	189	164	238	124	300	180	124	249	316	218	164	322	153	129	276	154	286	204	219	154	218	159	272	147	233	220	167	139	171	118	274
	0.5	0.5	0.5	0.5	0.5	0.5	0.5	0.5	0.5	0.5	0.5	0.5	0.5	0.5	0.5	0.5	0.5	0.5	0.5	0.5	0.5	0.5	0.5	0.5	0.5	0.5	0.5	0.5	0.5	0.5	0.5	0.5	0.5	0.5	0.5	0.5	0.5	0.5	0.5	0.5	0.5	0.5	0.5	0.5	0.5	0.5	0.5	0.5	0.5
57-pop3-64	131	121	242	224	285	116	186	135	102	191	139	176	255	178	238	237	177	258	192	180	238	128	315	184	140	249	324	218	168	346	161	129	276	154	290	208	219	158	230	171	272	147	233	219	187	147	171	118	274
57-pop3-64	127	121	242	204	285	116	182	135	102	179	135	164	255	178	230	233	177	258	183	176	238	124	312	150	120	249	316	202	168	342	157	129	276	154	286	200	219	150	218	151	272	147	217	219	187	143	171	115	274
	0.5	0.5	0.5	0.5	0.5	0.5	0.5	0.5	0.5	0.5	0.5	0.5	0.5	0.5	0.5	0.5	0.5	0.5	0.5	0.5	0.5	0.5	0.5	0.5	0.5	0.5	0.5	0.5	0.5	0.5	0.5	0.5	0.5	0.5	0.5	0.5	0.5	0.5	0.5	0.5	0.5	0.5	0.5	0.5	0.5	0.5	0.5	0.5	0.5
58-pop3-65	173	121	241	224	285	124	194	-9	102	182	135	176	255	178	234	237	181	258	192	136	238	128	312	161	136	-9	-9	222	164	338	169	150	276	163	286	212	227	158	226	-9	272	-9	229	219	187	139	171	118	270
58-pop3-65	169	121	238	220	285	120	186	-9	102	179	135	168	255	178	226	233	177	258	192	136	238	128	308	161	128	-9	-9	214	164	338	157	129	276	155	282	204	227	150	214	-9	272	-9	229	211	183	139	171	115	270
	0.5	0.5	0.5	0.5	0.5	0.5	0.5	0.5	0.5	0.5	0.5	0.5	0.5	0.5	0.5	0.5	0.5	0.5	0.5	0.5	0.5	0.5	0.5	0.5	0.5	0.5	0.5	0.5	0.5	0.5	0.5	0.5	0.5	0.5	0.5	0.5	0.5	0.5	0.5	0.5	0.5	0.5	0.5	0.5	0.5	0.5	0.5	0.5	0.5
59-pop3-66	135	121	247	228	293	124	186	135	102	185	131	164	255	181	234	241	192	261	-9	172	238	124	316	184	136	-9	324	218	168	338	157	129	276	162	282	196	219	154	230	163	272	-9	237	219	183	147	171	118	270
59-pop3-66	123	121	238	224	289	120	174	135	102	185	131	164	255	178	234	233	177	249	-9	136	238	116	300	161	128	-9	320	214	168	326	153	129	276	154	278	196	219	150	218	147	272	-9	225	219	167	139	171	112	266
	0.5	0.5	0.5	0.5	0.5	0.5	0.5	0.5	0.5	0.5	0.5	0.5	0.5	0.5	0.5	0.5	0.5	0.5	0.5	0.5	0.5	0.5	0.5	0.5	0.5	0.5	0.5	0.5	0.5	0.5	0.5	0.5	0.5	0.5	0.5	0.5	0.5	0.5	0.5	0.5	0.5	0.5	0.5	0.5	0.5	0.5	0.5	0.5	0.5
60-pop3-68	123	121	247	236	289	120	186	123	102	191	143	160	255	178	234	233	177	255	192	136	238	128	319	184	140	249	324	222	164	346	157	129	276	159	282	212	219	158	222	163	272	147	229	219	191	139	171	130	278
60-pop3-68	123	121	244	228	289	116	182	123	102	185	131	160	251	178	226	233	177	255	189	136	238	124	312	161	128	249	312	218	160	338	157	129	276	154	282	200	219	150	222	159	272	143	229	219	183	139	171	115	270
	0.5	0.5	0.5	0.5	0.5	0.5	0.5	0.5	0.5	0.5	0.5	0.5	0.5	0.5	0.5	0.5	0.5	0.5	0.5	0.5	0.5	0.5	0.5	0.5	0.5	0.5	0.5	0.5	0.5	0.5	0.5	0.5	0.5	0.5	0.5	0.5	0.5	0.5	0.5	0.5	0.5	0.5	0.5	0.5	0.5	0.5	0.5	0.5	0.5
61-pop3-69	-9	121	247	224	289	120	182	135	102	188	131	160	255	178	-9	237	-9	258	-9	136	238	128	315	184	132	-9	324	229	172	326	157	129	276	154	290	204	219	158	226	163	272	151	233	219	191	155	-9	-9	270
61-pop3-69	-9	121	242	224	285	120	174	123	102	179	127	160	255	178	-9	233	-9	255	-9	136	238	124	312	146	128	-9	312	225	164	326	157	129	276	154	286	200	219	154	218	155	272	147	229	219	167	151	-9	-9	270
	0.5	0.5	0.5	0.5	0.5	0.5	0.5	0.5	0.5	0.5	0.5	0.5	0.5	0.5	0.5	0.5	0.5	0.5	0.5	0.5	0.5	0.5	0.5	0.5	0.5	0.5	0.5	0.5	0.5	0.5	0.5	0.5	0.5	0.5	0.5	0.5	0.5	0.5	0.5	0.5	0.5	0.5	0.5	0.5	0.5	0.5	0.5	0.5	0.5
62-pop3-70	-9	124	242	228	293	128	174	139	102	191	135	168	255	181	234	237	188	261	192	176	238	128	312	184	140	253	320	222	172	342	165	150	280	158	286	208	219	158	222	163	272	-9	237	219	191	143	-9	115	270
62-pop3-70	-9	121	238	228	285	120	174	135	102	185	127	160	255	178	234	221	169	243	192	165	238	116	312	184	132	249	300	222	168	326	165	129	276	142	282	208	219	158	214	151	272	-9	233	219	191	143	-9	115	266
	0.5	0.5	0.5	0.5	0.5	0.5	0.5	0.5	0.5	0.5	0.5	0.5	0.5	0.5	0.5	0.5	0.5	0.5	0.5	0.5	0.5	0.5	0.5	0.5	0.5	0.5	0.5	0.5	0.5	0.5	0.5	0.5	0.5	0.5	0.5	0.5	0.5	0.5	0.5	0.5	0.5	0.5	0.5	0.5	0.5	0.5	0.5	0.5	0.5
63-pop3-90	173	121	244	232	289	120	186	135	102	182	139	164	255	178	238	221	177	252	195	172	238	124	312	146	132	253	-9	225	168	342	157	129	276	158	286	208	219	154	238	159	272	155	229	220	199	155	171	118	278
63-pop3-90	135	118	241	228	289	120	178	135	102	179	135	148	255	178	230	213	177	252	180	136	238	124	300	146	132	249	-9	217	156	334	149	129	276	142	278	196	219	150	222	159	272	147	225	220	183	143	167	112	270
	0.5	0.5	0.5	0.5	0.5	0.5	0.5	0.5	0.5	0.5	0.5	0.5	0.5	0.5	0.5	0.5	0.5	0.5	0.5	0.5	0.5	0.5	0.5	0.5	0.5	0.5	0.5	0.5	0.5	0.5	0.5	0.5	0.5	0.5	0.5	0.5	0.5	0.5	0.5	0.5	0.5	0.5	0.5	0.5	0.5	0.5	0.5	0.5	0.5
64-pop3-91	173	121	245	236	289	120	174	139	102	188	135	168	255	178	234	233	184	258	192	136	238	128	316	188	128	253	324	229	168	326	157	150	276	162	290	204	219	158	218	171	272	147	229	220	191	155	171	118	270
64-pop3-91	135	118	241	220	285	116	174	135	102	182	127	160	255	178	234	233	177	258	192	136	238	124	312	184	124	253	324	202	168	326	157	129	276	154	286	200	219	150	218	159	272	147	225	220	187	147	171	115	270
	0.5	0.5	0.5	0.5	0.5	0.5	0.5	0.5	0.5	0.5	0.5	0.5	0.5	0.5	0.5	0.5	0.5	0.5	0.5	0.5	0.5	0.5	0.5	0.5	0.5	0.5	0.5	0.5	0.5	0.5	0.5	0.5	0.5	0.5	0.5	0.5	0.5	0.5	0.5	0.5	0.5	0.5	0.5	0.5	0.5	0.5	0.5	0.5	0.5
65-pop4-73	173	121	244	247	289	124	186	-9	102	176	147	168	255	184	238	233	-9	258	186	140	238	124	324	165	140	-9	312	241	176	326	145	150	276	158	286	208	-9	154	222	159	272	147	-9	227	191	151	171	115	270
65-pop4-73	153	118	241	228	289	124	174	-9	102	176	131	164	251	178	234	233	-9	246	183	136	238	116	308	146	124	-9	308	214	140	318	141	129	276	158	274	192	-9	154	218	147	270	143	-9	227	183	147	171	109	266
	0.5	0.5	0.5	0.5	0.5	0.5	0.5	0.5	0.5	0.5	0.5	0.5	0.5	0.5	0.5	0.5	0.5	0.5	0.5	0.5	0.5	0.5	0.5	0.5	0.5	0.5	0.5	0.5	0.5	0.5	0.5	0.5	0.5	0.5	0.5	0.5	0.5	0.5	0.5	0.5	0.5	0.5	0.5	0.5	0.5	0.5	0.5	0.5	0.5
66-pop4-74	177	121	241	236	285	128	194	139	102	185	135	168	255	178	234	237	-9	261	192	168	238	124	312	184	140	-9	328	225	168	338	157	129	276	158	286	212	219	158	226	163	272	-9	229	219	191	143	-9	121	274
66-pop4-74	124	118	238	236	285	120	190	123	102	179	135	160	255	178	234	233	-9	258	174	136	238	116	312	161	124	-9	300	218	156	338	157	129	276	151	286	200	219	150	218	151	272	-9	229	219	183	139	-9	118	270
	0.5	0.5	0.5	0.5	0.5	0.5	0.5	0.5	0.5	0.5	0.5	0.5	0.5	0.5	0.5	0.5	0.5	0.5	0.5	0.5	0.5	0.5	0.5	0.5	0.5	0.5	0.5	0.5	0.5	0.5	0.5	0.5	0.5	0.5	0.5	0.5	0.5	0.5	0.5	0.5	0.5	0.5	0.5	0.5	0.5	0.5	0.5	0.5	0.5
67-pop4-75	165	121	241	224	289	120	190	143	102	194	146	172	255	178	234	237	177	264	192	136	238	128	308	184	132	249	328	259	168	338	153	129	276	158	286	212	219	150	230	155	272	147	225	219	187	143	171	121	274
67-pop4-75	138	118	241	216	289	116	178	123	102	185	127	148	255	178	234	229	173	249	192	136	238	124	304	184	128	249	320	222	168	338	149	129	276	158	278	208	219	146	226	151	268	139	221	219	187	139	171	118	266
	0.5	0.5	0.5	0.5	0.5	0.5	0.5	0.5	0.5	0.5	0.5	0.5	0.5	0.5	0.5	0.5	0.5	0.5	0.5	0.5	0.5	0.5	0.5	0.5	0.5	0.5	0.5	0.5	0.5	0.5	0.5	0.5	0.5	0.5	0.5	0.5	0.5	0.5	0.5	0.5	0.5	0.5	0.5	0.5	0.5	0.5	0.5	0.5	0.5
68-pop4-76	139	121	244	224	289	120	194	139	102	188	135	168	255	178	238	241	173	255	192	180	238	116	312	161	144	249	320	259	160	338	157	129	276	162	290	212	223	154	226	151	272	147	229	219	195	147	171	118	274
68-pop4-76	135	121	238	204	273	120	174	139	102	185	131	160	255	178	234	233	169	246	177	144	238	116	308	161	132	245	308	218	158	338	157	129	276	158	270	208	219	147	222	151	272	147	229	219	183	147	171	115	266
	0.5	0.5	0.5	0.5	0.5	0.5	0.5	0.5	0.5	0.5	0.5	0.5	0.5	0.5	0.5	0.5	0.5	0.5	0.5	0.5	0.5	0.5	0.5	0.5	0.5	0.5	0.5	0.5	0.5	0.5	0.5	0.5	0.5	0.5	0.5	0.5	0.5	0.5	0.5	0.5	0.5	0.5	0.5	0.5	0.5	0.5	0.5	0.5	0.5
69-pop4-77	135	121	250	236	289	120	190	-9	102	191	143	168	255	178	-9	233	-9	261	195	136	238	128	319	188	132	253	-9	251	172	334	169	150	276	162	286	208	231	154	226	163	272	151	233	219	187	147	171	121	278
69-pop4-77	135	118	238	216	285	120	186	-9	102	191	131	160	251	178	-9	229	-9	261	192	136	238	128	308	184	128	253	-9	218	168	318	145	129	276	150	278	196	219	150	218	159	272	143	225	219	187	143	171	112	270
	0.5	0.5	0.5	0.5	0.5	0.5	0.5	0.5	0.5	0.5	0.5	0.5	0.5	0.5	0.5	0.5	0.5	0.5	0.5	0.5	0.5	0.5	0.5	0.5	0.5	0.5	0.5	0.5	0.5	0.5	0.5	0.5	0.5	0.5	0.5	0.5	0.5	0.5	0.5	0.5	0.5	0.5	0.5	0.5	0.5	0.5	0.5	0.5	0.5
70-pop4-78	169	121	250	228	289	128	182	135	102	191	135	164	255	178	234	237	177	258	-9	176	238	116	316	192	140	253	328	218	176	334	153	129	276	162	286	204	223	158	230	171	272	151	245	219	191	143	171	121	270
70-pop4-78	135	118	248	228	285	120	174	127	102	185	131	156	255	178	234	237	177	246	-9	136	238	116	308	180	132	253	300	202	172	326	141	129	276	150	282	192	219	143	214	147	272	147	225	211	191	139	171	118	266
	0.5	0.5	0.5	0.5	0.5	0.5	0.5	0.5	0.5	0.5	0.5	0.5	0.5	0.5	0.5	0.5	0.5	0.5	0.5	0.5	0.5	0.5	0.5	0.5	0.5	0.5	0.5	0.5	0.5	0.5	0.5	0.5	0.5	0.5	0.5	0.5	0.5	0.5	0.5	0.5	0.5	0.5	0.5	0.5	0.5	0.5	0.5	0.5	0.5
71-pop4-79	135	121	242	216	289	116	194	135	102	191	127	168	255	181	238	241	177	258	189	180	238	116	319	192	128	249	324	218	164	326	157	129	276	158	282	212	231	154	222	163	272	155	233	219	195	143	-9	118	278
71-pop4-79	135	118	242	216	285	116	178	123	102	188	127	164	255	178	222	233	177	252	186	136	238	116	319	192	120	249	316	214	164	326	153	129	276	155	282	208	219	150	218	151	272	147	233	219	183	143	-9	115	274
	0.5	0.5	0.5	0.5	0.5	0.5	0.5	0.5	0.5	0.5	0.5	0.5	0.5	0.5	0.5	0.5	0.5	0.5	0.5	0.5	0.5	0.5	0.5	0.5	0.5	0.5	0.5	0.5	0.5	0.5	0.5	0.5	0.5	0.5	0.5	0.5	0.5	0.5	0.5	0.5	0.5	0.5	0.5	0.5	0.5	0.5	0.5	0.5	0.5
72-pop4-80	177	124	238	236	289	120	186	139	102	185	131	164	255	178	242	233	177	249	192	180	238	124	308	180	132	249	320	225	168	334	157	129	276	158	290	212	223	154	226	159	272	155	229	211	187	143	171	118	274
72-pop4-80	123	121	238	200	289	116	174	135	98	182	127	156	255	178	230	229	173	249	192	172	238	124	308	161	124	249	300	218	168	326	153	129	276	142	282	212	219	150	222	151	268	147	229	211	167	143	167	112	266
	0.5	0.5	0.5	0.5	0.5	0.5	0.5	0.5	0.5	0.5	0.5	0.5	0.5	0.5	0.5	0.5	0.5	0.5	0.5	0.5	0.5	0.5	0.5	0.5	0.5	0.5	0.5	0.5	0.5	0.5	0.5	0.5	0.5	0.5	0.5	0.5	0.5	0.5	0.5	0.5	0.5	0.5	0.5	0.5	0.5	0.5	0.5	0.5	0.5
73-pop4-81	177	121	242	224	289	120	194	131	102	191	139	164	255	181	238	237	188	258	189	136	238	124	308	184	136	253	-9	225	168	342	157	129	280	162	290	200	227	158	218	167	272	155	237	219	187	155	171	118	278
73-pop4-81	123	121	242	211	285	120	186	123	102	182	131	160	255	178	234	217	169	258	186	136	238	116	308	150	132	249	-9	222	168	334	153	129	276	142	282	196	219	150	218	163	272	147	225	219	183	155	171	118	270
	0.5	0.5	0.5	0.5	0.5	0.5	0.5	0.5	0.5	0.5	0.5	0.5	0.5	0.5	0.5	0.5	0.5	0.5	0.5	0.5	0.5	0.5	0.5	0.5	0.5	0.5	0.5	0.5	0.5	0.5	0.5	0.5	0.5	0.5	0.5	0.5	0.5	0.5	0.5	0.5	0.5	0.5	0.5	0.5	0.5	0.5	0.5	0.5	0.5
74-pop4-88	181	121	248	236	293	120	194	135	102	185	139	168	255	178	234	237	177	261	192	180	238	128	308	184	140	249	324	225	160	346	161	129	276	163	294	204	219	154	230	159	272	151	225	220	195	151	171	118	270
74-pop4-88	177	121	242	224	289	116	174	123	102	185	135	160	255	178	234	213	177	249	174	136	238	116	304	146	136	249	308	222	156	334	141	129	276	154	286	200	219	150	222	159	272	143	221	220	183	139	167	118	266
	0.5	0.5	0.5	0.5	0.5	0.5	0.5	0.5	0.5	0.5	0.5	0.5	0.5	0.5	0.5	0.5	0.5	0.5	0.5	0.5	0.5	0.5	0.5	0.5	0.5	0.5	0.5	0.5	0.5	0.5	0.5	0.5	0.5	0.5	0.5	0.5	0.5	0.5	0.5	0.5	0.5	0.5	0.5	0.5	0.5	0.5	0.5	0.5	0.5
75-pop4-89	177	124	247	224	289	124	190	135	102	185	135	168	255	181	238	237	173	258	192	180	238	128	312	184	132	253	-9	225	164	334	157	129	276	158	290	208	231	154	218	163	272	147	229	220	191	143	171	121	278
75-pop4-89	169	121	244	220	285	124	186	123	98	185	135	156	255	178	234	233	169	249	189	168	238	116	312	146	124	249	-9	222	160	334	157	129	276	158	286	204	219	150	218	151	272	131	225	220	183	135	171	115	274
	0.5	0.5	0.5	0.5	0.5	0.5	0.5	0.5	0.5	0.5	0.5	0.5	0.5	0.5	0.5	0.5	0.5	0.5	0.5	0.5	0.5	0.5	0.5	0.5	0.5	0.5	0.5	0.5	0.5	0.5	0.5	0.5	0.5	0.5	0.5	0.5	0.5	0.5	0.5	0.5	0.5	0.5	0.5	0.5	0.5	0.5	0.5	0.5	0.5
76-pop5-41	181	118	235	247	297	132	194	139	102	182	159	160	255	178	242	229	-9	252	189	152	238	124	324	166	124	269	-9	251	176	338	157	129	284	158	294	220	227	158	226	167	272	147	242	215	187	155	179	109	278
76-pop5-41	163	115	232	224	265	124	186	139	102	182	142	156	255	178	234	213	-9	243	168	148	238	124	304	154	124	245	-9	218	140	338	153	129	284	146	290	208	223	150	217	147	272	139	242	215	171	143	171	109	270
	0.5	0.5	0.5	0.5	0.5	0.5	0.5	0.5	0.5	0.5	0.5	0.5	0.5	0.5	0.5	0.5	0.5	0.5	0.5	0.5	0.5	0.5	0.5	0.5	0.5	0.5	0.5	0.5	0.5	0.5	0.5	0.5	0.5	0.5	0.5	0.5	0.5	0.5	0.5	0.5	0.5	0.5	0.5	0.5	0.5	0.5	0.5	0.5	0.5
77-pop5-60	145	121	244	240	285	128	202	143	102	191	127	168	251	178	234	229	184	261	189	168	238	128	320	184	148	265	324	270	168	338	157	129	276	158	294	208	223	154	226	155	272	147	237	227	199	155	171	118	274
77-pop5-60	135	118	241	219	281	124	186	135	102	185	127	164	251	169	230	213	173	246	180	168	238	120	312	177	136	253	320	214	164	326	157	129	276	150	274	204	215	150	222	151	272	139	229	220	191	147	167	115	270
	0.5	0.5	0.5	0.5	0.5	0.5	0.5	0.5	0.5	0.5	0.5	0.5	0.5	0.5	0.5	0.5	0.5	0.5	0.5	0.5	0.5	0.5	0.5	0.5	0.5	0.5	0.5	0.5	0.5	0.5	0.5	0.5	0.5	0.5	0.5	0.5	0.5	0.5	0.5	0.5	0.5	0.5	0.5	0.5	0.5	0.5	0.5	0.5	0.5
78-pop5-67	165	118	244	235	289	128	190	143	102	188	150	164	254	178	238	213	173	258	189	156	238	124	308	165	140	250	312	241	176	338	157	129	276	146	282	208	245	157	222	-9	272	147	229	228	195	151	195	118	286
78-pop5-67	153	118	244	212	285	116	178	127	102	173	142	156	251	172	234	213	169	258	186	156	238	124	304	154	120	245	308	222	156	318	145	129	276	142	274	208	235	154	222	-9	268	147	229	206	187	147	171	109	270
	0.5	0.5	0.5	0.5	0.5	0.5	0.5	0.5	0.5	0.5	0.5	0.5	0.5	0.5	0.5	0.5	0.5	0.5	0.5	0.5	0.5	0.5	0.5	0.5	0.5	0.5	0.5	0.5	0.5	0.5	0.5	0.5	0.5	0.5	0.5	0.5	0.5	0.5	0.5	0.5	0.5	0.5	0.5	0.5	0.5	0.5	0.5	0.5	0.5
79-pop6-39	177	124	235	216	289	124	194	135	126	191	215	172	251	178	238	233	-9	237	168	-9	242	136	323	181	136	269	-9	254	172	362	157	137	276	175	290	180	223	154	235	171	272	147	242	265	199	163	195	115	274
79-pop6-39	173	121	235	212	285	124	190	131	110	188	199	156	251	169	234	221	-9	237	168	-9	242	124	315	177	132	245	-9	247	172	354	129	135	276	170	286	180	223	146	214	163	268	131	226	261	195	151	187	115	250
	0.5	0.5	0.5	0.5	0.5	0.5	0.5	0.5	0.5	0.5	0.5	0.5	0.5	0.5	0.5	0.5	0.5	0.5	0.5	0.5	0.5	0.5	0.5	0.5	0.5	0.5	0.5	0.5	0.5	0.5	0.5	0.5	0.5	0.5	0.5	0.5	0.5	0.5	0.5	0.5	0.5	0.5	0.5	0.5	0.5	0.5	0.5	0.5	0.5
80-pop6-40	177	124	244	216	289	124	202	139	134	185	229	164	251	178	238	233	205	249	168	168	246	128	315	173	132	269	308	255	172	362	129	137	276	166	314	180	223	172	218	163	268	151	230	261	191	155	195	118	274
80-pop6-40	157	124	241	188	289	120	202	131	118	182	203	156	251	169	230	233	205	246	168	160	242	124	315	173	124	257	300	249	162	358	129	137	276	154	290	180	223	159	214	163	268	151	222	204	191	155	191	115	242
	0.5	0.5	0.5	0.5	0.5	0.5	0.5	0.5	0.5	0.5	0.5	0.5	0.5	0.5	0.5	0.5	0.5	0.5	0.5	0.5	0.5	0.5	0.5	0.5	0.5	0.5	0.5	0.5	0.5	0.5	0.5	0.5	0.5	0.5	0.5	0.5	0.5	0.5	0.5	0.5	0.5	0.5	0.5	0.5	0.5	0.5	0.5	0.5	0.5
81-pop6-82	177	133	244	212	289	128	198	139	118	188	215	164	251	178	246	237	-9	237	168	164	242	128	332	181	136	269	312	258	162	362	129	141	276	170	286	180	223	175	230	175	272	147	238	269	191	155	191	118	278
81-pop6-82	177	124	244	197	289	120	194	135	110	182	195	148	251	178	238	229	-9	237	168	160	242	124	316	177	124	269	308	254	158	350	125	137	276	170	282	180	223	172	214	163	272	131	214	204	187	147	187	118	270
	0.5	0.5	0.5	0.5	0.5	0.5	0.5	0.5	0.5	0.5	0.5	0.5	0.5	0.5	0.5	0.5	0.5	0.5	0.5	0.5	0.5	0.5	0.5	0.5	0.5	0.5	0.5	0.5	0.5	0.5	0.5	0.5	0.5	0.5	0.5	0.5	0.5	0.5	0.5	0.5	0.5	0.5	0.5	0.5	0.5	0.5	0.5	0.5	0.5
82-pop6-83	181	127	241	208	289	128	206	139	130	191	229	164	251	178	238	233	205	237	168	168	242	128	332	177	136	269	320	262	172	362	133	150	276	154	290	180	223	159	235	171	272	151	234	261	191	159	191	121	274
82-pop6-83	153	124	232	188	285	120	194	123	110	185	203	164	251	169	234	229	197	237	168	160	242	124	316	173	132	257	308	256	172	358	129	137	276	154	290	180	223	157	214	159	272	151	230	261	181	159	179	115	242
	0.5	0.5	0.5	0.5	0.5	0.5	0.5	0.5	0.5	0.5	0.5	0.5	0.5	0.5	0.5	0.5	0.5	0.5	0.5	0.5	0.5	0.5	0.5	0.5	0.5	0.5	0.5	0.5	0.5	0.5	0.5	0.5	0.5	0.5	0.5	0.5	0.5	0.5	0.5	0.5	0.5	0.5	0.5	0.5	0.5	0.5	0.5	0.5	0.5
83-pop6-84	173	121	235	212	289	124	202	139	118	176	191	152	251	181	246	229	197	246	168	164	242	128	316	181	136	273	316	260	172	362	129	141	276	154	286	180	223	158	230	163	272	147	234	261	191	163	191	118	274
83-pop6-84	157	121	235	208	289	124	186	127	118	176	191	148	251	178	242	229	193	237	168	160	242	128	316	173	124	261	308	244	158	354	129	138	276	154	282	180	223	153	227	163	272	147	226	220	187	147	187	115	270
	0.5	0.5	0.5	0.5	0.5	0.5	0.5	0.5	0.5	0.5	0.5	0.5	0.5	0.5	0.5	0.5	0.5	0.5	0.5	0.5	0.5	0.5	0.5	0.5	0.5	0.5	0.5	0.5	0.5	0.5	0.5	0.5	0.5	0.5	0.5	0.5	0.5	0.5	0.5	0.5	0.5	0.5	0.5	0.5	0.5	0.5	0.5	0.5	0.5
84-pop6-85	157	124	241	212	289	128	194	143	130	191	199	168	251	178	234	225	205	249	168	164	242	128	336	177	140	269	312	254	172	366	141	147	276	-9	290	180	227	154	214	171	272	151	234	265	195	159	199	112	274
84-pop6-85	157	121	238	188	289	128	194	143	114	185	183	160	251	178	234	221	205	237	168	156	242	124	316	177	132	249	304	244	168	362	129	141	276	-9	286	180	223	146	214	167	268	147	230	261	195	155	179	112	274
	0.5	0.5	0.5	0.5	0.5	0.5	0.5	0.5	0.5	0.5	0.5	0.5	0.5	0.5	0.5	0.5	0.5	0.5	0.5	0.5	0.5	0.5	0.5	0.5	0.5	0.5	0.5	0.5	0.5	0.5	0.5	0.5	0.5	0.5	0.5	0.5	0.5	0.5	0.5	0.5	0.5	0.5	0.5	0.5	0.5	0.5	0.5	0.5	0.5
[truncated: 261 more columns]
